# Supplementary material for: Natural Background Level and Contamination of Shallow Groundwater Salinity in Various Aquifers in a Coastal Urbanized Area, South China
Source: Hindawi journal article supplement (doi:10.1155/2021/2973092), 2021-08-06
Supplement: f1 [file 2973092.f1.docx]

Supplementary material

Natural background level and contamination of shallow groundwater salinity in various aquifers in a coastal urbanized area, south China

Pan Bia,b, Dongya Hanc,*, Chunyan Liuc, Liquan Xiaod, Heqiu Wue, Meng Zhanga

a School of Water Resources and Environment, Hebei GEO University, Shijiazhuang, China

b Key Laboratory of Sustained Development and Utilization of Water Resources, Shijiazhuang, China

c Institute of Hydrogeology and Environmental Geology, Chinese Academy of Geological Sciences, Shijiazhuang, China

d 416 Geological Team of Hunan Bureau of Geology and Mineral Exploration and Development, Zhuzhou, China

e Zhejiang Engineering Geophysical Survey and Design Institute Co., Ltd, Hangzhou, China

* Corresponding author E-mail address: handongyaycn@126.com (D. Han)

3.2 NBL assessment

Grubbs’ test is used to detect outliers from PS datasets as following equations:


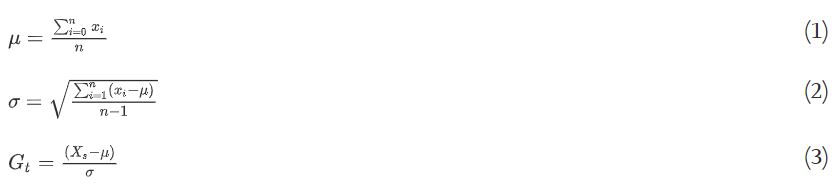


where μ is the mean value; n is the number of samples; xi is the measured data; σ is the standard deviation; Gt is Grubb’s test, and Xs is suspected value (Rahman et al., 2021). Critical values of the Grubbs’ test criterion are defined as Gc. When Gt > Gc, Xs is considered as an outlier.

Universal Kriging assumes the model as follows:

Z(s) = μ(s) + ε(s) (4)

where Z(s) is the variable of interest, μ(s) is some deterministic function, ε(s) is the random variation, and s indicates the location. The hole effect model was selected to fit the empirical semivariogram in addition to the nugget effect, owing to its matching the empirical semivariogram and having a relatively better performance evaluated from the prediction errors (Schröder et al., 2008; Wu et al., 2014). The hole effect semivariogram model is expressed as follows (ESRI 2003):


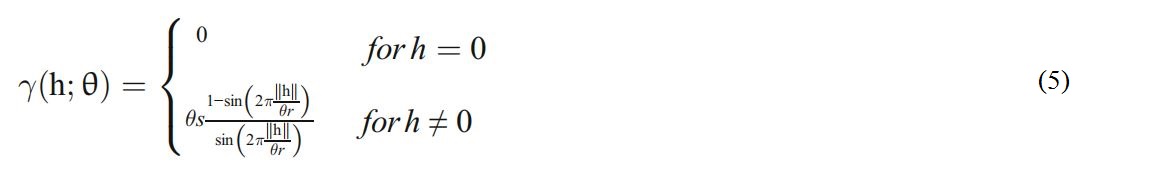


where θs ≥0 is the sill value, h is the lag vector, and ║h║ is the length of h (distance between two locations); θr is the range of the model.

Table S1 Socioeconomic data for the nine major cities of the PRD in 2006

| Socioeconomic parameters | Guangzhou | Shenzhen | Foshan | Dongguan | Huizhou | Zhaoqing | Jiangmen | Zhuhai | Zhongshan |
| --- | --- | --- | --- | --- | --- | --- | --- | --- | --- |
| PD (people / km2) | 1312 | 4334 | 1522 | 2738 | 337 | 249 | 431 | 859 | 1385 |
| GDP (Chinese  million Yuan / km2) | 81.7 | 297.7 | 76.1 | 106.6 | 8.4 | 3.5 | 9.9 | 44.3 | 57.6 |
| DSD (ton / km2) | 14.51 | 34.49 | 6.61 | 18.96 | 1.38 | 0.50 | 1.54 | 7.03 | 8.78 |
| IWD (ton / km2) | 2.75 | 3.27 | 5.84 | 9.79 | 0.56 | 0.50 | 1.27 | 2.03 | 5.71 |
| RUA (%) | 19.62 | 66.27 | 32.47 | 36.78 | 3.30 | 3.99 | 7.10 | 33.86 | 24.04 |
| IE (number / km2) | 0.70 | 2.63 | 1.56 | 1.86 | 0.11 | 0.05 | 0.26 | 0.58 | 2.07 |
| TVE (number / km2) | 9.55 | 0.00 | 1.69 | 34.15 | 7.34 | 3.91 | 9.99 | 5.28 | 37.16 |
| AO (Chinese  million Yuan / km2) | 1.67 | 0.20 | 0.17 | 0.43 | 0.60 | 0.66 | 0.56 | 0.39 | 0.96 |
| LO (Chinese  million Yuan / km2) | 0.74 | 0.34 | 0.13 | 0.23 | 0.28 | 0.43 | 0.45 | 0.30 | 0.44 |
| LD (number / km2) | 463 | 311 | 891 | 211 | 317 | 457 | 433 | 375 | 493 |

PD: population density; GDP: gross domestic product; DSD: domestic sewage discharge; IWD: industrial wastewater discharge; RUA: proportion of urbanized areas; IE: industrial enterprises above designated size; TVE: township-village enterprises; AO: agricultural output; LO: livestock output; LD: livestock density.

Table S2 Groundwater salinity contamination in UA formed in different periods in the Pearl River Delta

|  | Unit A | | | Unit B | | | Unit C | | |
| --- | --- | --- | --- | --- | --- | --- | --- | --- | --- |
| UA1st | UA2nd | UA3rd | UA1st | UA2nd | UA3rd | UA1st | UA2nd | UA3rd |
| Proportion of groundwater salinity contamination (%) | 47.4 | 46.7 | 30.4 | 8.3 | 42.9 | 18.5 | 0 | 38.5 | 16.7 |


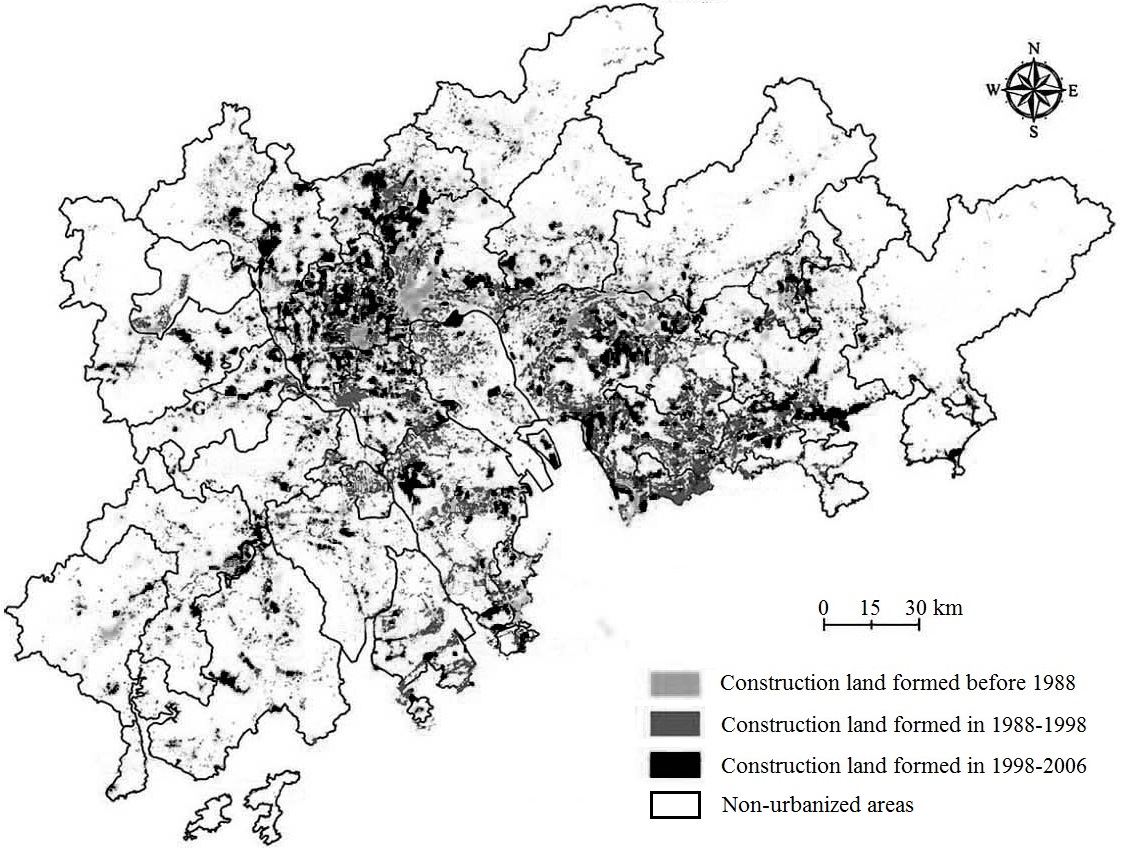


Fig. S1 The expansion of urbanization in the PRD.

**References**

ESRI (2003) ArcGIS 9: Using ArcGIS Geostatistical Analyst. ESRI, California. http://dusk.geo.orst.edu/gis/geostat_analyst.pdf Accessed 7 January 2014.

Rahman, A., Mondal, N.C., Fauzia, F., 2021. Arsenic enrichment and its natural background in groundwater at the proximity of active floodplains of Ganga River, northern India. Chemosphere 265, 129096.

Schröder W, Pesch R, Englert C et al (2008) Metal accumulation in mosses across national boundaries: uncovering and ranking causes of spatial variation. Environ Pollut 151:377-388.

Wu, Y., Wang, Y., Xie, X., 2014. Spatial occurrence and geochemistry of soil salinity in Datong basin, northern China. J. Soil. Sediment. 14, 1445-1455.
